# Supplementary material for: Understanding Marangoni flow-driven solidification of polymer semiconducting films on an aqueous substrate
Source: Royal Society of Chemistry journal article supplement (doi:10.1039/d0tc02339f), 2020-01-01
Supplement: d0tc02339f1.pdf [file d0tc02339f1.pdf]

# Supplementary Information

for

## Understanding Marangoni Flow-Driven Solidification of Polymer Semiconducting Films on an Aqueous Substrate

Giheon Choi<sup>†1</sup>, Kanghuck Lee<sup>2†</sup>, Seungtaek Oh<sup>1</sup>, Jungyoon Seo<sup>1</sup>, Cheulhwan Kim<sup>2</sup>, Tae Kyu An<sup>\*2,3</sup>, Jihoon Lee<sup>\*2,3</sup>, Hwa Sung Lee<sup>\*1</sup>

<sup>1</sup>Department of Materials Science and Chemical Engineering, Hanyang University, Ansan 15588, Republic of Korea.

<sup>2</sup>Department of IT Convergence, Korea National University of Transportation, Chungju 27469, Republic of Korea

<sup>3</sup>Department of Polymer Science and Engineering, Korea National University of Transportation, Chungju 27469, Republic of Korea

<sup>†</sup>G. Choi, S. Oh, and K. Lee contributed equally to this work.

\*Corresponding author. E-mail: [taekyu1985@ut.ac.kr](mailto:taekyu1985@ut.ac.kr) (T. K. An), [jihoonli@ut.ac.kr](mailto:jihoonli@ut.ac.kr) (J. Lee), [hslee78@hanyang.ac.kr](mailto:hslee78@hanyang.ac.kr) (H. S. Lee)

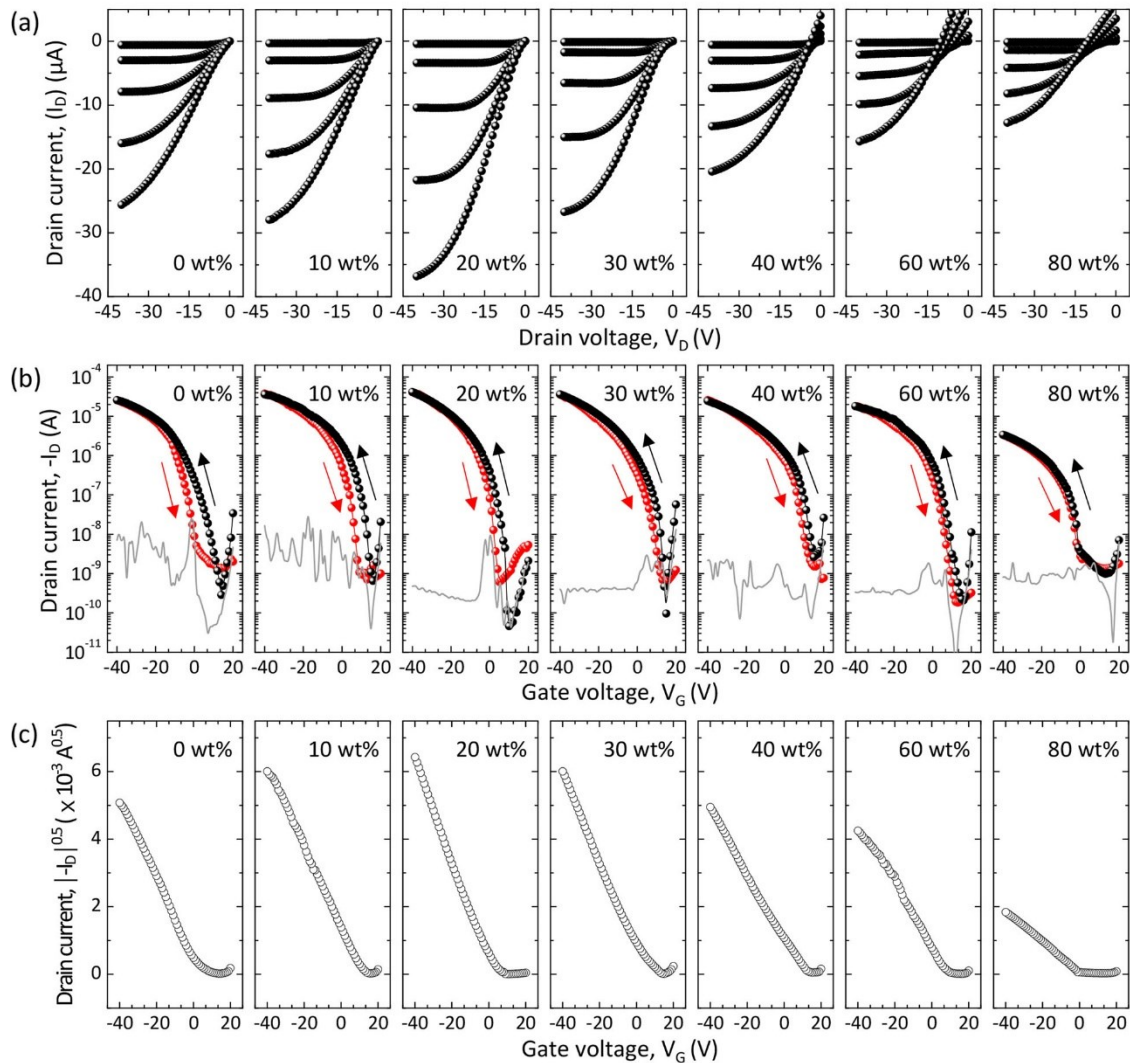

**Figure S1.** (a) Output and (b) transfer characteristics of the PTDPP OFET devices fabricated by applying the UST process for various EtOH concentrations in the base media. The output characteristics of each FET were measured using a stepped  $V_G$  of  $-10$  V, and transfer characteristics were measured at a fixed  $V_D$  of  $-40$  V. (c)  $|I_D|^{0.5} - V_G$  curves were used to extract the  $\mu_{\text{FET}}$  and  $V_{\text{th}}$  values from the transfer characteristics of the PTDPP OFET devices fabricated using the UST process for various EtOH concentrations.

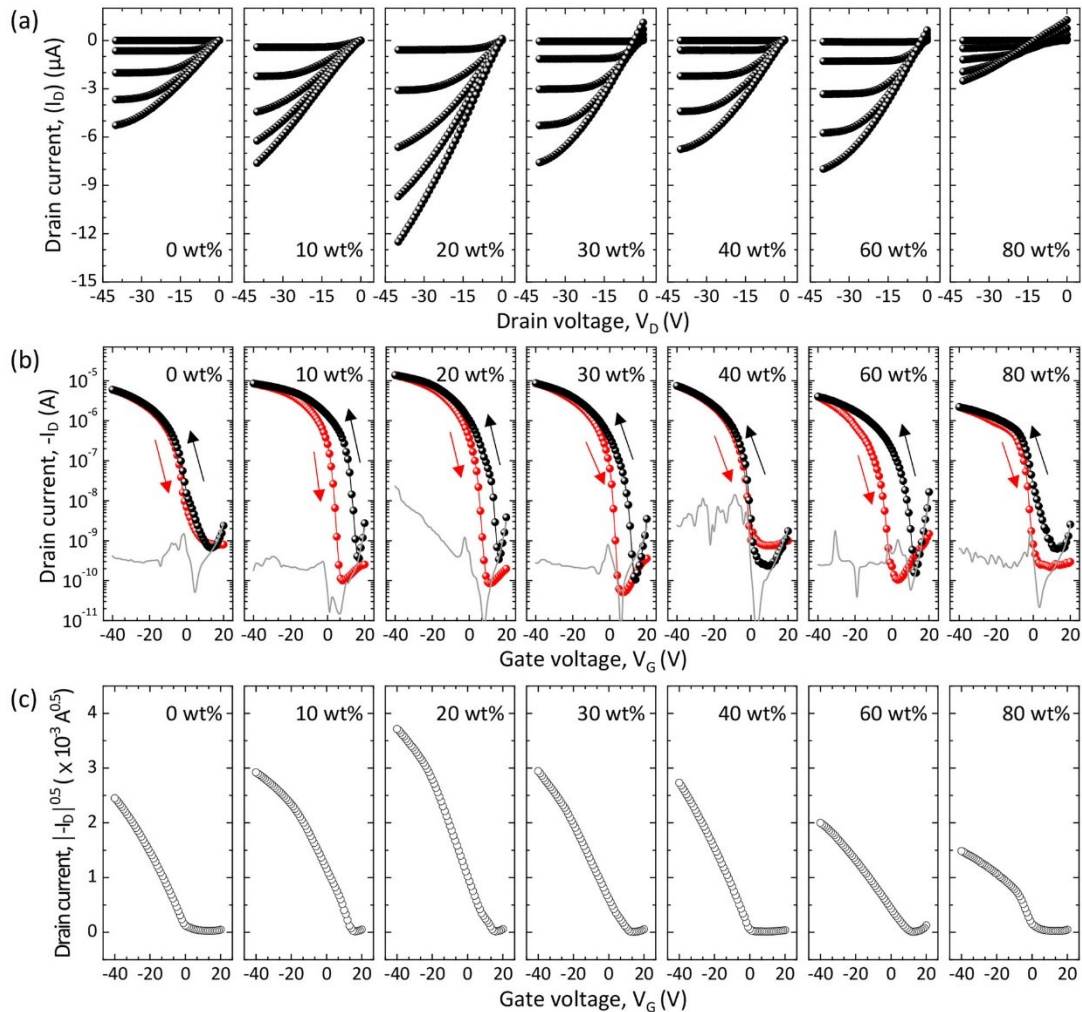

**Figure S2.** (a) Output and (b) transfer characteristics of PTDPP OFET devices fabricated by applying the BST process as a function of the EtOH concentration. The output characteristics of each FET were measured using a stepped  $V_G$  of  $-10$  V, and the transfer characteristics were measured at a fixed  $V_D$  of  $-40$  V. (c)  $|I_D|^{0.5}$ - $V_G$  curves were used to extract the  $\mu_{\text{FET}}$  and  $V_{\text{th}}$  values from the transfer characteristics of the PTDPP OFET devices fabricated using the BST process as a function of the EtOH concentration.

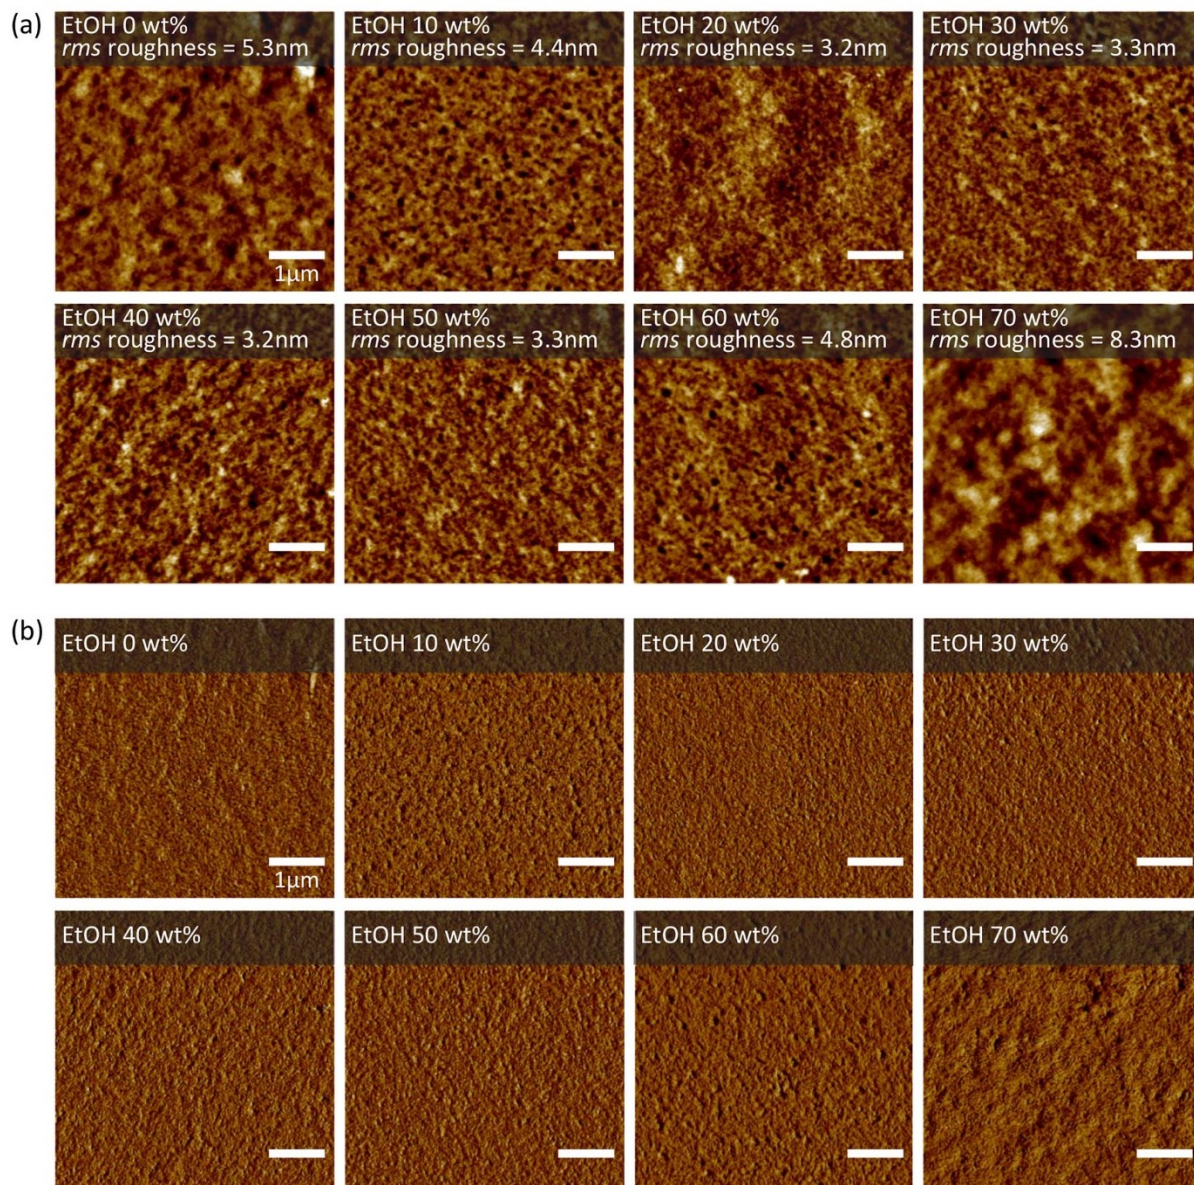

**Figure S3.** AFM morphologies of the PTDPP films prepared using the BST process as a function of the EtOH concentration: **(a)** height and **(b)** phase mode images of the PTDPP films. All scale bars indicate 1  $\mu\text{m}$ .

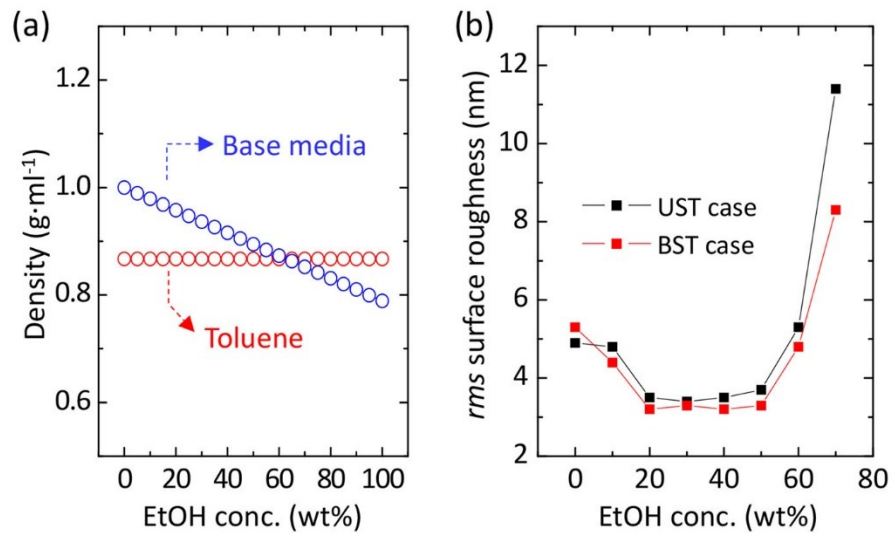

**Figure S4. (a)** Density of toluene and the base media as a function of the EtOH content. **(b)** Variations in the *rms* surface roughness values of the PTDPP films prepared using the UST and BST processes.

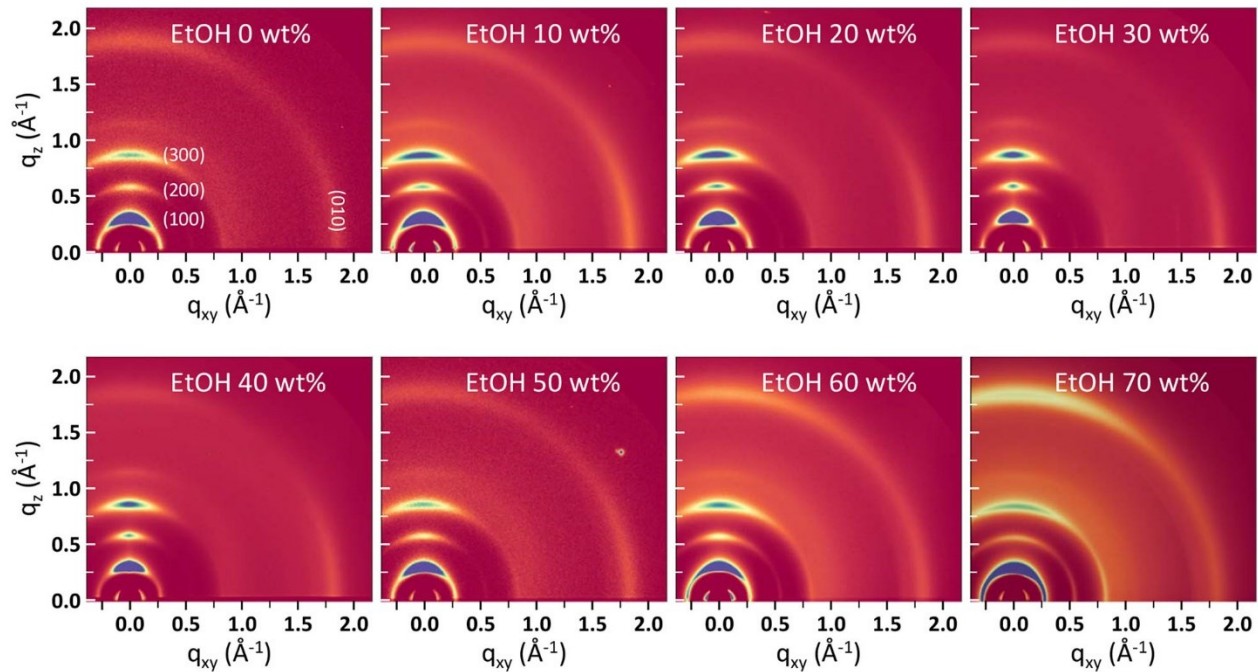

**Figure S5.** 2D GIXD patterns obtained from PTDPP DI-CN2 films prepared using the BST process at various EtOH concentrations.

**Table S1.** Summary of the PTDPP OFET performances prepared using the UST and BST processes with various EtOH concentrations.

| <b>UST case</b>                                                                      |       |       |       |       |       |       |       |       |       |       |
|--------------------------------------------------------------------------------------|-------|-------|-------|-------|-------|-------|-------|-------|-------|-------|
| EtOH wt%                                                                             | 0     | 5     | 10    | 20    | 30    | 40    | 50    | 60    | 70    | 80    |
| $\mu_{\text{FET}}$ ( $\text{cm}^2\text{V}^{-1}\text{s}^{-1}$ )                       | 0.21  | 0.21  | 0.29  | 0.36  | 0.28  | 0.17  | 0.12  | 0.094 | 0.075 | 0.039 |
| Standard deviation of $\mu_{\text{FET}}$ ( $\text{cm}^2\text{V}^{-1}\text{s}^{-1}$ ) | 0.038 | 0.051 | 0.063 | 0.087 | 0.074 | 0.066 | 0.059 | 0.041 | 0.025 | 0.030 |
| <b>BST case</b>                                                                      |       |       |       |       |       |       |       |       |       |       |
| EtOH wt%                                                                             | 0     | 5     | 10    | 20    | 30    | 40    | 50    | 60    | 70    | 80    |
| $\mu_{\text{FET}}$ ( $\text{cm}^2\text{V}^{-1}\text{s}^{-1}$ )                       | 0.017 | 0.038 | 0.026 | 0.034 | 0.028 | 0.021 | 0.026 | 0.030 | 0.040 | 0.015 |
| Standard deviation of $\mu_{\text{FET}}$ ( $\text{cm}^2\text{V}^{-1}\text{s}^{-1}$ ) | 0.011 | 0.023 | 0.023 | 0.033 | 0.024 | 0.018 | 0.030 | 0.030 | 0.031 | 0.025 |
